# Supplementary material
Source: Springer Nature journal article supplement (https://www.springermedizin.de/resource/supplementary/12889_2012_5441_MOESM3_ESM.pdf/9495286)
Supplement: MOESM3 [file 9495286]

# **HIV Epidemic Stage**

**Criminalization, Homophobia, Human Rights Contexts, Condom Availability,  
Excluded from National Surveillance, Sexual Health Education**

**Lack of preventive services, Stigma,  
VCT Access, ART Access**

**STI Prevalence,  
Unprotected Receptive or Insertive Intercourse, BME**

**GUD, Lack of circumcision, frequency of male partners,  
high lifetime partners, IDU, poppers, meth**

## Level of Risks

**Stage of Epidemic**

**Public Policy**

**Community**

**Network**

**Individual**

Legend: VCT (voluntary counseling and testing); ART (anti-retroviral therapy); IDU (injection drug use); GUD (genital ulcer disease)
